# Supplementary material for: A natural language processing approach to categorise contributing factors from patient safety event reports
Source: PubMed Central journal article supplement — BMJ Health Care Inform. 2023 May 31;30(1):e100731. doi: 10.1136/bmjhci-2022-100731 (PMC10254979; doi:10.1136/bmjhci-2022-100731), 2023-05-31
Supplement: bmjhci-2022-100731supp001.pdf [file bmjhci-2022-100731supp001.pdf]

## Appendix A

All reports were transformed to lowercase, and extra white spaces, numbers, and stop words were removed. Ngrams (e.g., unigrams, bigrams) were extracted. Periods at the end of the sentences were not removed, so the sentences are identifiable; all other punctuation was removed, and words stemmed.

## Appendix B

We explored the use of a natural language processing approach in categorizing socio-technical contributing factors assigned to a PSE report; therefore, the five socio-technical contributing factors (communication/handoff failure, policy/procedure issue, technology issue, lapse/slip, distractions/interruptions) are the ones used in assigning labels for categorization models.

We selected the five most frequent socio-technical contributing factors in this study. The rest of the socio-technical contributing factors were excluded due to having a very small number of PSE reports. This small number will limit the machine learning models ability to learn the underlying patterns in the dataset.

| <b>Contributing Factor</b>    | <b>Frequency</b> |
|-------------------------------|------------------|
| Communication/Handoff Failure | 9,765 (18.1%)    |
| Policy/Procedure Issue        | 3,895 (7.2%)     |
| Technology Issue              | 2,724 (5.1%)     |
| Lapse/Slip                    | 1,236 (2.3%)     |
| Distractions/Interruptions    | 1,143 (2.1%)     |

Table B.1. The contributing factors and their associated frequencies in PSE report dataset. This table presents the total number of times a contributing factor was listed either by itself or other factors. A PSE report may be associated with more than one contributing factor.

## Appendix C

Table C.1 in the following presents the average number of sentences associated with each socio-technical contributing factor before and after incorporating information-rich sentence selection algorithm. As the number of selected information-rich ngrams increased, the average number of selected information-rich sentences increased.

| Average Number of Sentences                          | Communication/ Handoff Failure | Policy/ Procedure Issue | Technology Issue | Lapse/ Slip | Distractions/ Interruptions |
|------------------------------------------------------|--------------------------------|-------------------------|------------------|-------------|-----------------------------|
| before Information-rich sentence selection algorithm | 8.9                            | 9.8                     | 8.2              | 6.8         | 7.4                         |
| with top 2 Information-rich ngrams                   | 1.5                            | 0.1                     | 0.1              | 1.4         | 0.2                         |
| with top 5 Information-rich ngrams                   | 2.4                            | 0.3                     | 0.8              | 2.9         | 1.4                         |
| with top 10 Information-rich ngrams                  | 3.1                            | 2.5                     | 1.8              | 3.2         | 2.7                         |
| with top 40 Information-rich ngrams                  | 4.6                            | 5                       | 3                | 4           | 3.9                         |
| with top 60 Information-rich ngrams                  | 5.1                            | 6                       | 3.8              | 4.3         | 4.2                         |
| with top 100 Information-rich ngrams                 | 5.9                            | 6.6                     | 4.4              | 4.5         | 4.6                         |

Table C.1. The average number of sentences before and after incorporating information-rich sentence selection algorithm.

## Appendix D

### D.1. Training and Testing Dataset

Table D.1 in the following presents the number of PSE reports grouped by socio-technical contributing factors in training and testing datasets.

| Communication/<br>Handoff Failure |       | Policy/<br>Issue Procedure |      | Technology Issue |      | Lapse/ Slip |      | Distractions/<br>Interruptions |      |
|-----------------------------------|-------|----------------------------|------|------------------|------|-------------|------|--------------------------------|------|
| Train                             | Test  | Train                      | Test | Train            | Test | Train       | Test | Train                          | Test |
| 7,812                             | 1,953 | 3,097                      | 798  | 2,212            | 512  | 1,014       | 222  | 925                            | 218  |

Table D.1. The number of PSE reports grouped by socio-technical contributing factors in training and testing datasets.

### D.2. Optimized Models' Hyper-parameters

To achieve the optimized values of models' hyper-parameters, we utilized Bayesian optimization algorithm and 5-fold cross-validation technique. The following table presents the optimized hyper-parameters in each model and their value.

|                                              | Socio-technical Contributing Factors |                               |                     |             |                                |
|----------------------------------------------|--------------------------------------|-------------------------------|---------------------|-------------|--------------------------------|
|                                              | Communication/<br>Handoff Failure    | Policy/<br>Procedure<br>Issue | Technology<br>Issue | Lapse/ Slip | Distractions/<br>Interruptions |
| <b>Number of Information-rich<br/>ngrams</b> | 60                                   | 5                             | 2                   | 100         | 60                             |
| <b>Elastic net</b>                           |                                      |                               |                     |             |                                |
| Alpha                                        |                                      |                               |                     | 0.001       | 0.001                          |
| L1 regularization                            |                                      |                               |                     | 0.0001      | 0.0001                         |
| <b>XGBoost</b>                               |                                      |                               |                     |             |                                |
| N boosting rounds                            | 50                                   |                               | 50                  |             |                                |
| Learning rate                                | 0.13                                 |                               | 0.088               |             |                                |

|                        |       |       |      |  |  |
|------------------------|-------|-------|------|--|--|
| Maximum depth of trees | 5     |       | 3    |  |  |
| Maximum delta step     | 3.54  |       | 2.29 |  |  |
| Regularization lambda  | 12.77 |       | 7.78 |  |  |
| Regularization alpha   | 0.001 |       | 0.42 |  |  |
| Scale positive weight  | 45.82 |       | 9.77 |  |  |
| <b>FFNN</b>            |       |       |      |  |  |
| Learning rate          |       | 0.001 |      |  |  |
| Number of dense units  |       | 64    |      |  |  |
| Dropout regularization |       | 0.2   |      |  |  |
| Batch size             |       | 512   |      |  |  |

Table D.2. Optimized hyper-parameter values of best-performing categorization models for each socio-technical contributing factors.

### D.3. Models Performance Metrics

#### D.3.1. Communication/Handoff

Table D.3.1. Communication/handoff failure categorization through elastic net model

|                    | Communication/Hand-off Failure |       |             |       |             |       |              |       |              |       |              |       |               |       |
|--------------------|--------------------------------|-------|-------------|-------|-------------|-------|--------------|-------|--------------|-------|--------------|-------|---------------|-------|
|                    | All Terms                      |       | 2 Top Terms |       | 5 Top Terms |       | 10 Top Terms |       | 40 Top Terms |       | 60 Top Terms |       | 100 Top Terms |       |
|                    | Train                          | Test  | Train       | Test  | Train       | Test  | Train        | Test  | Train        | Test  | Train        | Test  | Train         | Test  |
| AUROC              | 0.880                          | 0.870 | 0.909       | 0.775 | 0.873       | 0.838 | 0.861        | 0.832 | 0.873        | 0.854 | 0.871        | 0.852 | 0.875         | 0.859 |
| SEN                | 0.850                          | 0.837 | 0.854       | 0.522 | 0.85        | 0.786 | 0.85         | 0.792 | 0.85         | 0.814 | 0.85         | 0.817 | 0.85          | 0.83  |
| SPE                | 0.753                          | 0.750 | 0.827       | 0.819 | 0.754       | 0.73  | 0.719        | 0.708 | 0.734        | 0.727 | 0.73         | 0.723 | 0.738         | 0.733 |
| PPV                | 0.433                          | 0.426 | 0.106       | 0.073 | 0.424       | 0.388 | 0.431        | 0.413 | 0.436        | 0.421 | 0.431        | 0.415 | 0.43          | 0.42  |
| NPV                | 0.958                          | 0.954 | 0.996       | 0.984 | 0.959       | 0.94  | 0.95         | 0.929 | 0.953        | 0.941 | 0.953        | 0.943 | 0.955         | 0.949 |
| ACC                | 0.573                          | 0.564 | 0.828       | 0.811 | 0.771       | 0.74  | 0.745        | 0.725 | 0.756        | 0.744 | 0.753        | 0.741 | 0.759         | 0.751 |
| F-1                | 0.771                          | 0.766 | 0.189       | 0.128 | 0.566       | 0.519 | 0.572        | 0.543 | 0.577        | 0.555 | 0.572        | 0.551 | 0.571         | 0.558 |
| AUPRC              | 0.631                          | 0.609 | 0.221       | 0.105 | 0.569       | 0.49  | 0.594        | 0.544 | 0.63         | 0.6   | 0.627        | 0.595 | 0.631         | 0.602 |
| Number of features | 6,674                          |       | 2,788       |       | 3,194       |       | 3,623        |       | 4,685        |       | 4,965        |       | 5,551         |       |

Table D.3.2. Communication/handoff failure categorization through XGBoost model

|       | Communication/Hand-off Failure |       |             |       |             |       |              |       |              |       |              |       |               |       |
|-------|--------------------------------|-------|-------------|-------|-------------|-------|--------------|-------|--------------|-------|--------------|-------|---------------|-------|
|       | All Terms                      |       | 2 Top Terms |       | 5 Top Terms |       | 10 Top Terms |       | 40 Top Terms |       | 60 Top Terms |       | 100 Top Terms |       |
|       | Train                          | Test  | Train       | Test  | Train       | Test  | Train        | Test  | Train        | Test  | Train        | Test  | Train         | Test  |
| AUROC | 0.884                          | 0.856 | 0.893       | 0.839 | 0.871       | 0.816 | 0.875        | 0.821 | 0.842        | 0.830 | 0.870        | 0.839 | 0.874         | 0.843 |
| SEN   | 0.850                          | 0.822 | 0.881       | 0.815 | 0.850       | 0.756 | 0.850        | 0.761 | 0.854        | 0.851 | 0.850        | 0.815 | 0.852         | 0.808 |

|                    |       |       |       |       |       |       |       |       |       |       |       |              |       |       |
|--------------------|-------|-------|-------|-------|-------|-------|-------|-------|-------|-------|-------|--------------|-------|-------|
| SPE                | 0.744 | 0.735 | 0.746 | 0.714 | 0.729 | 0.709 | 0.732 | 0.719 | 0.651 | 0.643 | 0.704 | 0.698        | 0.724 | 0.713 |
| PPV                | 0.424 | 0.407 | 0.433 | 0.389 | 0.429 | 0.385 | 0.435 | 0.400 | 0.372 | 0.367 | 0.408 | 0.394        | 0.418 | 0.397 |
| NPV                | 0.957 | 0.949 | 0.966 | 0.945 | 0.953 | 0.923 | 0.953 | 0.924 | 0.949 | 0.947 | 0.952 | 0.940        | 0.955 | 0.941 |
| ACC                | 0.565 | 0.544 | 0.581 | 0.527 | 0.570 | 0.511 | 0.576 | 0.525 | 0.519 | 0.513 | 0.551 | 0.531        | 0.561 | 0.532 |
| F-1                | 0.763 | 0.751 | 0.771 | 0.733 | 0.752 | 0.718 | 0.755 | 0.727 | 0.690 | 0.684 | 0.732 | 0.721        | 0.748 | 0.731 |
| AUPRC              | 0.658 | 0.577 | 0.647 | 0.505 | 0.595 | 0.496 | 0.618 | 0.511 | 0.570 | 0.543 | 0.659 | <b>0.576</b> | 0.617 | 0.560 |
| Number of features | 6,674 |       | 2,788 |       | 3,194 |       | 3,623 |       | 4,685 |       | 4,965 |              | 5,551 |       |

Table D.3.3. Communication/handoff failure categorization through feed-forward neural network model

|                    | Communication/Hand-off Failure |       |             |       |             |       |              |       |              |       |              |       |               |       |
|--------------------|--------------------------------|-------|-------------|-------|-------------|-------|--------------|-------|--------------|-------|--------------|-------|---------------|-------|
|                    | All Terms                      |       | 2 Top Terms |       | 5 Top Terms |       | 10 Top Terms |       | 40 Top Terms |       | 60 Top Terms |       | 100 Top Terms |       |
|                    | Train                          | Test  | Train       | Test  | Train       | Test  | Train        | Test  | Train        | Test  | Train        | Test  | Train         | Test  |
| AUROC              | 0.902                          | 0.873 | 0.888       | 0.841 | 0.885       | 0.831 | 0.884        | 0.833 | 0.901        | 0.851 | 0.898        | 0.855 | 0.898         | 0.860 |
| SEN                | 0.850                          | 0.803 | 0.850       | 0.787 | 0.850       | 0.762 | 0.850        | 0.773 | 0.850        | 0.775 | 0.850        | 0.781 | 0.850         | 0.786 |
| SPE                | 0.794                          | 0.774 | 0.767       | 0.735 | 0.756       | 0.726 | 0.759        | 0.732 | 0.782        | 0.758 | 0.778        | 0.755 | 0.783         | 0.760 |
| PPV                | 0.477                          | 0.440 | 0.445       | 0.399 | 0.454       | 0.402 | 0.461        | 0.416 | 0.487        | 0.438 | 0.478        | 0.434 | 0.477         | 0.433 |
| NPV                | 0.960                          | 0.947 | 0.959       | 0.939 | 0.955       | 0.927 | 0.954        | 0.929 | 0.956        | 0.933 | 0.956        | 0.935 | 0.957         | 0.938 |
| ACC                | 0.611                          | 0.568 | 0.584       | 0.530 | 0.592       | 0.526 | 0.598        | 0.541 | 0.619        | 0.560 | 0.612        | 0.558 | 0.611         | 0.558 |
| F-1                | 0.804                          | 0.779 | 0.782       | 0.745 | 0.774       | 0.733 | 0.776        | 0.740 | 0.796        | 0.762 | 0.792        | 0.760 | 0.796         | 0.765 |
| AUPRC              | 0.692                          | 0.620 | 0.623       | 0.508 | 0.641       | 0.524 | 0.649        | 0.539 | 0.706        | 0.597 | 0.703        | 0.609 | 0.688         | 0.605 |
| Number of features | 6,674                          |       | 2,788       |       | 3,194       |       | 3,623        |       | 4,685        |       | 4,965        |       | 5,551         |       |

## D.3.2. Policy/Procedure Issue

Table D.3.4. Policy/procedure issue categorization through elastic net model

|                    | Policy/Procedure Issue |       |             |       |             |             |              |              |              |       |              |       |               |       |
|--------------------|------------------------|-------|-------------|-------|-------------|-------------|--------------|--------------|--------------|-------|--------------|-------|---------------|-------|
|                    | All Terms              |       | 2 Top Terms |       | 5 Top Terms |             | 10 Top Terms |              | 40 Top Terms |       | 60 Top Terms |       | 100 Top Terms |       |
|                    | Train                  | Test  | Train       | Test  | Train       | Test        | Train        | Test         | Train        | Test  | Train        | Test  | Train         | Test  |
| AUROC              | 0.889                  | 0.852 | 0.993       | 0.674 | 0.983       | 0.922       | 0.889        | 0.831        | 0.875        | 0.821 | 0.878        | 0.829 | 0.881         | 0.835 |
| SEN                | 0.850                  | 0.779 | 0.859       | 0.043 | 0.852       | 0.817       | 0.85         | 0.737        | 0.85         | 0.751 | 0.85         | 0.756 | 0.85          | 0.763 |
| SPE                | 0.764                  | 0.756 | 0.988       | 0.984 | 0.97        | 0.967       | 0.76         | 0.746        | 0.734        | 0.72  | 0.741        | 0.73  | 0.747         | 0.735 |
| PPV                | 0.219                  | 0.199 | 0.339       | 0.024 | 0.54        | 0.521       | 0.233        | 0.194        | 0.217        | 0.19  | 0.216        | 0.192 | 0.217         | 0.192 |
| NPV                | 0.985                  | 0.978 | 0.999       | 0.991 | 0.994       | 0.992       | 0.983        | 0.972        | 0.983        | 0.971 | 0.983        | 0.973 | 0.984         | 0.974 |
| ACC                | 0.349                  | 0.317 | 0.987       | 0.975 | 0.965       | 0.96        | 0.767        | 0.746        | 0.744        | 0.723 | 0.749        | 0.732 | 0.775         | 0.737 |
| F-1                | 0.770                  | 0.757 | 0.486       | 0.031 | 0.661       | 0.636       | 0.366        | 0.307        | 0.346        | 0.303 | 0.344        | 0.306 | 0.346         | 0.307 |
| AUPRC              | 0.418                  | 0.340 | 0.689       | 0.02  | 0.738       | <b>0.62</b> | 0.444        | <b>0.342</b> | 0.42         | 0.339 | 0.415        | 0.334 | 0.416         | 0.335 |
| number of features | 6,647                  |       | 2,737       |       | 2,751       |             | 3,177        |              | 4,525        |       | 5,171        |       | 5,451         |       |

Table D.3.5. Policy/procedure issue categorization through XGBoost model

|       | Policy/Procedure Issue |       |             |       |             |       |              |       |              |       |              |       |               |       |
|-------|------------------------|-------|-------------|-------|-------------|-------|--------------|-------|--------------|-------|--------------|-------|---------------|-------|
|       | All Terms              |       | 2 Top Terms |       | 5 Top Terms |       | 10 Top Terms |       | 40 Top Terms |       | 60 Top Terms |       | 100 Top Terms |       |
|       | Train                  | Test  | Train       | Test  | Train       | Test  | Train        | Test  | Train        | Test  | Train        | Test  | Train         | Test  |
| AUROC | 0.830                  | 0.787 | 0.895       | 0.676 | 0.984       | 0.928 | 0.928        | 0.876 | 0.835        | 0.795 | 0.885        | 0.807 | 0.877         | 0.816 |
| SEN   | 0.920                  | 0.860 | 0.973       | 0.640 | 0.857       | 0.810 | 0.864        | 0.746 | 0.879        | 0.820 | 0.852        | 0.712 | 0.853         | 0.736 |

|                    |       |       |       |       |       |              |       |              |       |              |       |              |       |              |
|--------------------|-------|-------|-------|-------|-------|--------------|-------|--------------|-------|--------------|-------|--------------|-------|--------------|
| SPE                | 0.578 | 0.576 | 0.603 | 0.586 | 0.966 | 0.965        | 0.833 | 0.821        | 0.605 | 0.594        | 0.747 | 0.731        | 0.728 | 0.715        |
| PPV                | 0.145 | 0.136 | 0.018 | 0.015 | 0.503 | 0.497        | 0.276 | 0.230        | 0.163 | 0.152        | 0.221 | 0.184        | 0.206 | 0.176        |
| NPV                | 0.989 | 0.981 | 1.000 | 0.994 | 0.994 | 0.992        | 0.988 | 0.978        | 0.983 | 0.974        | 0.984 | 0.968        | 0.984 | 0.970        |
| ACC                | 0.251 | 0.236 | 0.035 | 0.029 | 0.634 | 0.616        | 0.419 | 0.351        | 0.275 | 0.257        | 0.350 | 0.292        | 0.332 | 0.284        |
| F-1                | 0.603 | 0.597 | 0.606 | 0.586 | 0.962 | 0.959        | 0.835 | 0.816        | 0.627 | 0.613        | 0.755 | 0.730        | 0.738 | 0.716        |
| AUPRC              | 0.327 | 0.265 | 0.102 | 0.021 | 0.654 | <b>0.559</b> | 0.529 | <b>0.414</b> | 0.344 | <b>0.303</b> | 0.426 | <b>0.311</b> | 0.418 | <b>0.314</b> |
| number of features | 6,647 |       | 2,737 |       | 2,751 |              | 3,177 |              | 4,525 |              | 5,171 |              | 5,451 |              |

Table D.3.6. Policy/procedure issue categorization through feed-forward neural network model

|                    | Policy/Procedure Issue |       |             |       |             |              |              |              |              |              |              |       |               |              |
|--------------------|------------------------|-------|-------------|-------|-------------|--------------|--------------|--------------|--------------|--------------|--------------|-------|---------------|--------------|
|                    | All Terms              |       | 2 Top Terms |       | 5 Top Terms |              | 10 Top Terms |              | 40 Top Terms |              | 60 Top Terms |       | 100 Top Terms |              |
|                    | Train                  | Test  | Train       | Test  | Train       | Test         | Train        | Test         | Train        | Test         | Train        | Test  | Train         | Test         |
| AUROC              | 0.899                  | 0.846 | 0.936       | 0.514 | 0.969       | 0.920        | 0.921        | 0.874        | 0.885        | 0.806        | 0.897        | 0.820 | 0.901         | 0.829        |
| SEN                | 0.850                  | 0.765 | 0.863       | 0.160 | 0.850       | 0.736        | 0.851        | 0.753        | 0.850        | 0.723        | 0.850        | 0.705 | 0.850         | 0.719        |
| SPE                | 0.778                  | 0.760 | 0.915       | 0.885 | 0.976       | 0.972        | 0.835        | 0.820        | 0.746        | 0.716        | 0.782        | 0.759 | 0.779         | 0.759        |
| PPV                | 0.229                  | 0.199 | 0.069       | 0.013 | 0.590       | 0.530        | 0.276        | 0.231        | 0.226        | 0.185        | 0.247        | 0.200 | 0.241         | 0.198        |
| NPV                | 0.985                  | 0.977 | 0.999       | 0.991 | 0.994       | 0.988        | 0.987        | 0.979        | 0.983        | 0.967        | 0.984        | 0.968 | 0.984         | 0.970        |
| ACC                | 0.361                  | 0.316 | 0.128       | 0.025 | 0.697       | 0.616        | 0.417        | 0.354        | 0.358        | 0.294        | 0.383        | 0.311 | 0.376         | 0.310        |
| F-1                | 0.783                  | 0.761 | 0.914       | 0.878 | 0.971       | 0.962        | 0.836        | 0.816        | 0.754        | 0.717        | 0.788        | 0.755 | 0.784         | 0.756        |
| AUPRC              | 0.468                  | 0.309 | 0.720       | 0.014 | 0.829       | <b>0.655</b> | 0.519        | <b>0.364</b> | 0.465        | <b>0.315</b> | 0.473        | 0.298 | 0.496         | <b>0.316</b> |
| number of features | 6,647                  |       | 2,737       |       | 2,751       |              | 3,177        |              | 4,525        |              | 5,171        |       | 5,451         |              |

## D.3.3. Technology Issue

Table D.3.7. Technology issue categorization through elastic net model

|                    | Technology Issue |       |             |              |             |       |              |       |              |       |              |       |               |       |
|--------------------|------------------|-------|-------------|--------------|-------------|-------|--------------|-------|--------------|-------|--------------|-------|---------------|-------|
|                    | All Terms        |       | 2 Top Terms |              | 5 Top Terms |       | 10 Top Terms |       | 40 Top Terms |       | 60 Top Terms |       | 100 Top Terms |       |
|                    | Train            | Test  | Train       | Test         | Train       | Test  | Train        | Test  | Train        | Test  | Train        | Test  | Train         | Test  |
| AUROC              | 0.914            | 0.868 | 0.999       | 0.817        | 0.912       | 0.705 | 0.911        | 0.853 | 0.907        | 0.857 | 0.908        | 0.866 | 0.908         | 0.868 |
| SEN                | 0.850            | 0.738 | 0.999       | 0.45         | 0.851       | 0.533 | 0.85         | 0.715 | 0.85         | 0.725 | 0.85         | 0.777 | 0.85          | 0.774 |
| SPE                | 0.818            | 0.817 | 0.999       | 0.947        | 0.829       | 0.768 | 0.809        | 0.797 | 0.81         | 0.804 | 0.804        | 0.799 | 0.802         | 0.803 |
| PPV                | 0.199            | 0.177 | 0.999       | 0.692        | 0.482       | 0.263 | 0.217        | 0.163 | 0.228        | 0.186 | 0.21         | 0.18  | 0.196         | 0.176 |
| NPV                | 0.990            | 0.983 | 0.999       | 0.867        | 0.967       | 0.914 | 0.989        | 0.981 | 0.988        | 0.979 | 0.989        | 0.984 | 0.989         | 0.985 |
| ACC                | 0.322            | 0.286 | 0.999       | 0.844        | 0.832       | 0.737 | 0.811        | 0.793 | 0.813        | 0.8   | 0.807        | 0.798 | 0.804         | 0.802 |
| F-1                | 0.819            | 0.813 | 0.999       | 0.545        | 0.615       | 0.352 | 0.346        | 0.266 | 0.36         | 0.296 | 0.337        | 0.292 | 0.319         | 0.287 |
| AUPRC              | 0.467            | 0.374 | 0.999       | <b>0.542</b> | 0.668       | 0.34  | 0.426        | 0.304 | 0.444        | 0.342 | 0.458        | 0.349 | 0.45          | 0.345 |
| Number of features | 6,670            |       | 1,440       |              | 2,981       |       | 3,227        |       | 3,362        |       | 3,857        |       | 4,264         |       |

Table D.3.8. Technology issue categorization through XGBoost model

|  | Technology Issue |      |             |      |             |      |              |      |              |      |              |      |               |      |
|--|------------------|------|-------------|------|-------------|------|--------------|------|--------------|------|--------------|------|---------------|------|
|  | All Terms        |      | 2 Top Terms |      | 5 Top Terms |      | 10 Top Terms |      | 40 Top Terms |      | 60 Top Terms |      | 100 Top Terms |      |
|  | Train            | Test | Train       | Test | Train       | Test | Train        | Test | Train        | Test | Train        | Test | Train         | Test |

|                    |       |       |       |              |       |              |       |       |       |       |       |              |       |              |
|--------------------|-------|-------|-------|--------------|-------|--------------|-------|-------|-------|-------|-------|--------------|-------|--------------|
| AUROC              | 0.902 | 0.845 | 0.997 | 0.827        | 0.854 | 0.706        | 0.889 | 0.841 | 0.892 | 0.820 | 0.901 | 0.842        | 0.915 | 0.838        |
| SEN                | 0.850 | 0.725 | 0.920 | 0.400        | 0.851 | 0.713        | 0.923 | 0.851 | 0.850 | 0.715 | 0.859 | 0.761        | 0.850 | 0.691        |
| SPE                | 0.782 | 0.778 | 0.989 | 0.908        | 0.647 | 0.620        | 0.677 | 0.673 | 0.754 | 0.753 | 0.766 | 0.762        | 0.808 | 0.803        |
| PPV                | 0.172 | 0.148 | 0.972 | 0.533        | 0.311 | 0.226        | 0.151 | 0.126 | 0.186 | 0.151 | 0.184 | 0.154        | 0.201 | 0.160        |
| NPV                | 0.990 | 0.982 | 0.968 | 0.852        | 0.959 | 0.933        | 0.993 | 0.988 | 0.987 | 0.977 | 0.989 | 0.983        | 0.990 | 0.980        |
| ACC                | 0.286 | 0.246 | 0.945 | 0.457        | 0.455 | 0.343        | 0.260 | 0.219 | 0.305 | 0.250 | 0.302 | 0.256        | 0.325 | 0.260        |
| F-1                | 0.785 | 0.775 | 0.969 | 0.802        | 0.679 | 0.633        | 0.691 | 0.682 | 0.760 | 0.750 | 0.771 | 0.762        | 0.810 | 0.797        |
| AUPRC              | 0.402 | 0.284 | 0.992 | <b>0.569</b> | 0.632 | <b>0.349</b> | 0.371 | 0.260 | 0.427 | 0.262 | 0.457 | <b>0.294</b> | 0.474 | <b>0.301</b> |
| number of features | 6,670 |       | 1,440 |              | 2,981 |              | 3,227 |       | 3,362 |       | 3,857 |              | 4,264 |              |

Table D.3.9. Technology issue categorization through feed-forward neural network model

|                    | Technology Issue |       |             |              |             |       |              |       |              |       |              |       |               |       |
|--------------------|------------------|-------|-------------|--------------|-------------|-------|--------------|-------|--------------|-------|--------------|-------|---------------|-------|
|                    | All Terms        |       | 2 Top Terms |              | 5 Top Terms |       | 10 Top Terms |       | 40 Top Terms |       | 60 Top Terms |       | 100 Top Terms |       |
|                    | Train            | Test  | Train       | Test         | Train       | Test  | Train        | Test  | Train        | Test  | Train        | Test  | Train         | Test  |
| AUROC              | 0.937            | 0.867 | 0.979       | 0.824        | 0.836       | 0.664 | 0.908        | 0.843 | 0.891        | 0.833 | 0.911        | 0.855 | 0.924         | 0.856 |
| SEN                | 0.850            | 0.672 | 0.857       | 0.600        | 0.851       | 0.647 | 0.850        | 0.694 | 0.850        | 0.750 | 0.850        | 0.730 | 0.850         | 0.715 |
| SPE                | 0.870            | 0.857 | 0.989       | 0.908        | 0.611       | 0.574 | 0.796        | 0.789 | 0.755        | 0.747 | 0.796        | 0.788 | 0.833         | 0.817 |
| PPV                | 0.258            | 0.201 | 0.970       | 0.632        | 0.290       | 0.191 | 0.207        | 0.154 | 0.186        | 0.155 | 0.204        | 0.164 | 0.224         | 0.175 |
| NPV                | 0.991            | 0.980 | 0.944       | 0.896        | 0.956       | 0.913 | 0.988        | 0.979 | 0.987        | 0.980 | 0.989        | 0.981 | 0.990         | 0.981 |
| ACC                | 0.396            | 0.309 | 0.910       | 0.615        | 0.433       | 0.295 | 0.333        | 0.252 | 0.306        | 0.256 | 0.329        | 0.267 | 0.355         | 0.282 |
| F-1                | 0.869            | 0.848 | 0.951       | 0.844        | 0.649       | 0.584 | 0.799        | 0.784 | 0.761        | 0.747 | 0.799        | 0.785 | 0.834         | 0.812 |
| AUPRC              | 0.597            | 0.372 | 0.969       | <b>0.545</b> | 0.602       | 0.307 | 0.483        | 0.285 | 0.438        | 0.295 | 0.502        | 0.347 | 0.534         | 0.316 |
| Number of features | 6,670            |       | 1,440       |              | 2,981       |       | 3,227        |       | 3,362        |       | 3,857        |       | 4,264         |       |

## D.3.4. Lapse/Slip

Table D.3.10. Lapse/Slip categorization through elastic net model

|                    | Lapse/Slip |       |             |       |             |       |              |       |              |       |              |       |               |              |
|--------------------|------------|-------|-------------|-------|-------------|-------|--------------|-------|--------------|-------|--------------|-------|---------------|--------------|
|                    | All Terms  |       | 2 Top Terms |       | 5 Top Terms |       | 10 Top Terms |       | 40 Top Terms |       | 60 Top Terms |       | 100 Top Terms |              |
|                    | Train      | Test  | Train       | Test  | Train       | Test  | Train        | Test  | Train        | Test  | Train        | Test  | Train         | Test         |
| AUROC              | 0.946      | 0.925 | 0.816       | 0.607 | 0.917       | 0.774 | 0.931        | 0.867 | 0.937        | 0.904 | 0.939        | 0.911 | 0.941         | 0.917        |
| SEN                | 0.850      | 0.773 | 0.851       | 0.604 | 0.851       | 0.535 | 0.851        | 0.647 | 0.851        | 0.746 | 0.85         | 0.748 | 0.851         | 0.779        |
| SPE                | 0.892      | 0.887 | 0.614       | 0.579 | 0.826       | 0.803 | 0.864        | 0.852 | 0.875        | 0.864 | 0.882        | 0.873 | 0.882         | 0.874        |
| PPV                | 0.156      | 0.139 | 0.211       | 0.137 | 0.231       | 0.139 | 0.182        | 0.134 | 0.163        | 0.136 | 0.162        | 0.137 | 0.156         | 0.137        |
| NPV                | 0.996      | 0.994 | 0.971       | 0.93  | 0.989       | 0.967 | 0.994        | 0.986 | 0.995        | 0.992 | 0.995        | 0.992 | 0.996         | 0.994        |
| ACC                | 0.263      | 0.235 | 0.639       | 0.582 | 0.827       | 0.788 | 0.864        | 0.845 | 0.874        | 0.861 | 0.881        | 0.87  | 0.882         | 0.872        |
| F-1                | 0.891      | 0.885 | 0.338       | 0.223 | 0.363       | 0.22  | 0.299        | 0.222 | 0.273        | 0.231 | 0.272        | 0.232 | 0.264         | 0.233        |
| AUPRC              | 0.254      | 0.174 | 0.387       | 0.155 | 0.428       | 0.167 | 0.307        | 0.159 | 0.268        | 0.169 | 0.259        | 0.171 | 0.257         | <b>0.174</b> |
| number of features | 6,632      |       | 3,415       |       | 3,663       |       | 3,533        |       | 4,180        |       | 4,661        |       | 5,164         |              |

Table D.3.11. Lapse/Slip categorization through XGBoost model

|  | Lapse/Slip |      |             |      |             |      |              |      |              |      |              |      |               |      |
|--|------------|------|-------------|------|-------------|------|--------------|------|--------------|------|--------------|------|---------------|------|
|  | All Terms  |      | 2 Top Terms |      | 5 Top Terms |      | 10 Top Terms |      | 40 Top Terms |      | 60 Top Terms |      | 100 Top Terms |      |
|  | Train      | Test | Train       | Test | Train       | Test | Train        | Test | Train        | Test | Train        | Test | Train         | Test |



|                    |       |       |       |              |       |              |       |       |       |              |       |       |       |       |
|--------------------|-------|-------|-------|--------------|-------|--------------|-------|-------|-------|--------------|-------|-------|-------|-------|
| AUROC              | 0.859 | 0.846 | 0.981 | 0.590        | 0.811 | 0.754        | 0.958 | 0.841 | 0.932 | 0.882        | 0.950 | 0.872 | 0.904 | 0.880 |
| SEN                | 0.854 | 0.854 | 0.851 | 0.134        | 0.852 | 0.785        | 0.851 | 0.471 | 0.851 | 0.700        | 0.850 | 0.583 | 0.851 | 0.820 |
| SPE                | 0.787 | 0.773 | 0.962 | 0.936        | 0.604 | 0.599        | 0.912 | 0.891 | 0.860 | 0.859        | 0.901 | 0.893 | 0.810 | 0.803 |
| PPV                | 0.086 | 0.081 | 0.733 | 0.188        | 0.117 | 0.104        | 0.255 | 0.132 | 0.147 | 0.125        | 0.187 | 0.128 | 0.103 | 0.096 |
| NPV                | 0.996 | 0.996 | 0.982 | 0.907        | 0.985 | 0.979        | 0.994 | 0.979 | 0.995 | 0.990        | 0.996 | 0.988 | 0.995 | 0.994 |
| ACC                | 0.156 | 0.148 | 0.787 | 0.157        | 0.205 | 0.184        | 0.392 | 0.206 | 0.251 | 0.211        | 0.306 | 0.210 | 0.183 | 0.172 |
| F-1                | 0.789 | 0.775 | 0.950 | 0.856        | 0.619 | 0.609        | 0.910 | 0.877 | 0.860 | 0.854        | 0.899 | 0.885 | 0.811 | 0.803 |
| AUPRC              | 0.177 | 0.136 | 0.822 | <b>0.137</b> | 0.219 | <b>0.148</b> | 0.466 | 0.133 | 0.281 | <b>0.138</b> | 0.305 | 0.127 | 0.166 | 0.121 |
| number of features | 6,632 |       | 3,415 |              | 3,663 |              | 3,533 |       | 4,180 |              | 4,661 |       | 5,164 |       |

Table D.3.12. Lapse/Slip categorization through feed-forward neural network model

|                    | Lapse/Slip |       |             |       |             |       |              |       |              |       |              |       |               |       |
|--------------------|------------|-------|-------------|-------|-------------|-------|--------------|-------|--------------|-------|--------------|-------|---------------|-------|
|                    | All Terms  |       | 2 Top Terms |       | 5 Top Terms |       | 10 Top Terms |       | 40 Top Terms |       | 60 Top Terms |       | 100 Top Terms |       |
|                    | Train      | Test  | Train       | Test  | Train       | Test  | Train        | Test  | Train        | Test  | Train        | Test  | Train         | Test  |
| AUROC              | 0.948      | 0.910 | 0.888       | 0.555 | 0.885       | 0.733 | 0.917        | 0.845 | 0.926        | 0.887 | 0.923        | 0.886 | 0.925         | 0.882 |
| SEN                | 0.850      | 0.721 | 0.851       | 0.403 | 0.851       | 0.640 | 0.851        | 0.683 | 0.851        | 0.708 | 0.850        | 0.744 | 0.851         | 0.721 |
| SPE                | 0.896      | 0.887 | 0.735       | 0.685 | 0.745       | 0.705 | 0.815        | 0.807 | 0.848        | 0.845 | 0.845        | 0.839 | 0.856         | 0.852 |
| PPV                | 0.161      | 0.130 | 0.280       | 0.124 | 0.170       | 0.114 | 0.140        | 0.111 | 0.137        | 0.116 | 0.128        | 0.111 | 0.131         | 0.111 |
| NPV                | 0.996      | 0.993 | 0.976       | 0.912 | 0.988       | 0.971 | 0.994        | 0.986 | 0.995        | 0.990 | 0.995        | 0.992 | 0.996         | 0.992 |
| ACC                | 0.270      | 0.221 | 0.422       | 0.189 | 0.283       | 0.194 | 0.241        | 0.191 | 0.237        | 0.199 | 0.223        | 0.193 | 0.227         | 0.193 |
| F-1                | 0.895      | 0.883 | 0.747       | 0.657 | 0.751       | 0.702 | 0.816        | 0.803 | 0.848        | 0.841 | 0.845        | 0.837 | 0.855         | 0.849 |
| AUPRC              | 0.338      | 0.180 | 0.643       | 0.133 | 0.399       | 0.142 | 0.315        | 0.151 | 0.293        | 0.151 | 0.280        | 0.158 | 0.378         | 0.176 |
| number of features | 6,632      |       | 3,415       |       | 3,663       |       | 3,533        |       | 4,180        |       | 4,661        |       | 5,164         |       |

## D.3.5. Distractions/Interruptions

Table D.3.13. Distractions/interruptions categorization through elastic net model

|                    | Distractions/Interruptions |       |             |       |             |       |              |       |              |       |              |       |               |       |
|--------------------|----------------------------|-------|-------------|-------|-------------|-------|--------------|-------|--------------|-------|--------------|-------|---------------|-------|
|                    | All Terms                  |       | 2 Top Terms |       | 5 Top Terms |       | 10 Top Terms |       | 40 Top Terms |       | 60 Top Terms |       | 100 Top Terms |       |
|                    | Train                      | Test  | Train       | Test  | Train       | Test  | Train        | Test  | Train        | Test  | Train        | Test  | Train         | Test  |
| AUROC              | 0.963                      | 0.948 | 0.999       | 0.577 | 0.942       | 0.815 | 0.924        | 0.829 | 0.95         | 0.92  | 0.953        | 0.925 | 0.955         | 0.931 |
| SEN                | 0.850                      | 0.777 | 0.999       | 0.833 | 0.868       | 0.584 | 0.838        | 0.63  | 0.92         | 0.854 | 0.932        | 0.879 | 0.938         | 0.877 |
| SPE                | 0.925                      | 0.925 | 0.218       | 0.154 | 0.85        | 0.839 | 0.849        | 0.843 | 0.848        | 0.846 | 0.949        | 0.848 | 0.85          | 0.849 |
| PPV                | 0.197                      | 0.184 | 0.191       | 0.132 | 0.288       | 0.207 | 0.255        | 0.194 | 0.151        | 0.141 | 0.144        | 0.137 | 0.137         | 0.13  |
| NPV                | 0.997                      | 0.995 | 0.999       | 0.857 | 0.989       | 0.965 | 0.988        | 0.974 | 0.997        | 0.995 | 0.998        | 0.996 | 0.998         | 0.996 |
| ACC                | 0.320                      | 0.298 | 0.34        | 0.244 | 0.851       | 0.821 | 0.848        | 0.831 | 0.85         | 0.847 | 0.851        | 0.849 | 0.852         | 0.85  |
| F-1                | 0.924                      | 0.922 | 0.321       | 0.227 | 0.433       | 0.306 | 0.392        | 0.296 | 0.26         | 0.242 | 0.25         | 0.238 | 0.239         | 0.226 |
| AUPRC              | 0.372                      | 0.267 | 0.999       | 0.158 | 0.574       | 0.238 | 0.469        | 0.245 | 0.387        | 0.25  | 0.381        | 0.248 | 0.375         | 0.243 |
| number of features | 6,678                      |       | 1,083       |       | 2,840       |       | 3,273        |       | 3,867        |       | 3,970        |       | 4,413         |       |

Table D.3.14. Distractions/interruptions categorization through XGBoost model

|  | Distractions/Interruptions |      |             |      |             |      |              |      |              |      |              |      |               |      |
|--|----------------------------|------|-------------|------|-------------|------|--------------|------|--------------|------|--------------|------|---------------|------|
|  | All Terms                  |      | 2 Top Terms |      | 5 Top Terms |      | 10 Top Terms |      | 40 Top Terms |      | 60 Top Terms |      | 100 Top Terms |      |
|  | Train                      | Test | Train       | Test | Train       | Test | Train        | Test | Train        | Test | Train        | Test | Train         | Test |

|                    |       |       |       |       |       |              |       |              |       |       |       |              |       |       |
|--------------------|-------|-------|-------|-------|-------|--------------|-------|--------------|-------|-------|-------|--------------|-------|-------|
| AUROC              | 0.968 | 0.927 | 0.996 | 0.521 | 0.915 | 0.803        | 0.929 | 0.802        | 0.898 | 0.891 | 0.963 | 0.917        | 0.935 | 0.896 |
| SEN                | 0.850 | 0.642 | 0.868 | 0.000 | 0.853 | 0.606        | 0.851 | 0.577        | 0.863 | 0.836 | 0.851 | 0.686        | 0.851 | 0.771 |
| SPE                | 0.936 | 0.933 | 0.990 | 0.923 | 0.803 | 0.799        | 0.844 | 0.838        | 0.780 | 0.782 | 0.923 | 0.920        | 0.850 | 0.851 |
| PPV                | 0.224 | 0.171 | 0.943 | 0.000 | 0.233 | 0.178        | 0.252 | 0.176        | 0.104 | 0.101 | 0.232 | 0.191        | 0.126 | 0.117 |
| NPV                | 0.997 | 0.992 | 0.976 | 0.857 | 0.987 | 0.966        | 0.989 | 0.971        | 0.995 | 0.994 | 0.996 | 0.991        | 0.996 | 0.993 |
| ACC                | 0.354 | 0.270 | 0.904 | 0.000 | 0.366 | 0.276        | 0.389 | 0.270        | 0.185 | 0.181 | 0.364 | 0.299        | 0.220 | 0.204 |
| F-1                | 0.934 | 0.926 | 0.971 | 0.800 | 0.806 | 0.786        | 0.844 | 0.823        | 0.783 | 0.783 | 0.921 | 0.914        | 0.850 | 0.849 |
| AUPRC              | 0.379 | 0.203 | 0.978 | 0.129 | 0.589 | <b>0.213</b> | 0.586 | <b>0.210</b> | 0.200 | 0.192 | 0.507 | <b>0.239</b> | 0.365 | 0.197 |
| number of features | 6,678 |       | 1,083 |       | 2,840 |              | 3,273 |              | 3,867 |       | 3,970 |              | 4,413 |       |

Table D.3.15. Distractions/interruptions categorization through feed-forward neural network model

|                    | Distractions/Interruptions |       |             |       |             |       |              |       |              |       |              |       |               |       |
|--------------------|----------------------------|-------|-------------|-------|-------------|-------|--------------|-------|--------------|-------|--------------|-------|---------------|-------|
|                    | All Terms                  |       | 2 Top Terms |       | 5 Top Terms |       | 10 Top Terms |       | 40 Top Terms |       | 60 Top Terms |       | 100 Top Terms |       |
|                    | Train                      | Test  | Train       | Test  | Train       | Test  | Train        | Test  | Train        | Test  | Train        | Test  | Train         | Test  |
| AUROC              | 0.956                      | 0.924 | 0.995       | 0.607 | 0.885       | 0.763 | 0.866        | 0.783 | 0.948        | 0.910 | 0.952        | 0.906 | 0.954         | 0.907 |
| SEN                | 0.850                      | 0.734 | 0.868       | 0.333 | 0.851       | 0.613 | 0.851        | 0.741 | 0.851        | 0.772 | 0.851        | 0.691 | 0.850         | 0.696 |
| SPE                | 0.912                      | 0.910 | 0.990       | 0.769 | 0.738       | 0.727 | 0.696        | 0.674 | 0.888        | 0.879 | 0.900        | 0.897 | 0.899         | 0.889 |
| PPV                | 0.174                      | 0.150 | 0.943       | 0.182 | 0.186       | 0.140 | 0.148        | 0.120 | 0.182        | 0.158 | 0.188        | 0.155 | 0.176         | 0.139 |
| NPV                | 0.996                      | 0.994 | 0.976       | 0.882 | 0.986       | 0.963 | 0.987        | 0.977 | 0.995        | 0.992 | 0.996        | 0.991 | 0.996         | 0.991 |
| ACC                | 0.288                      | 0.249 | 0.904       | 0.235 | 0.305       | 0.228 | 0.252        | 0.206 | 0.300        | 0.263 | 0.308        | 0.253 | 0.292         | 0.232 |
| F-1                | 0.911                      | 0.906 | 0.971       | 0.711 | 0.745       | 0.720 | 0.705        | 0.678 | 0.887        | 0.876 | 0.899        | 0.891 | 0.898         | 0.885 |
| AUPRC              | 0.391                      | 0.239 | 0.977       | 0.152 | 0.416       | 0.189 | 0.405        | 0.181 | 0.457        | 0.223 | 0.458        | 0.197 | 0.423         | 0.201 |
| number of features | 6,678                      |       | 1,083       |       | 2,840       |       | 3,273        |       | 3,867        |       | 3,970        |       | 4,413         |       |
